# Supplementary material
Source: Springer Nature journal article supplement (https://www.springermedizin.de/resource/supplementary/13012_2012_657_MOESM4_ESM.pdf/9630458)

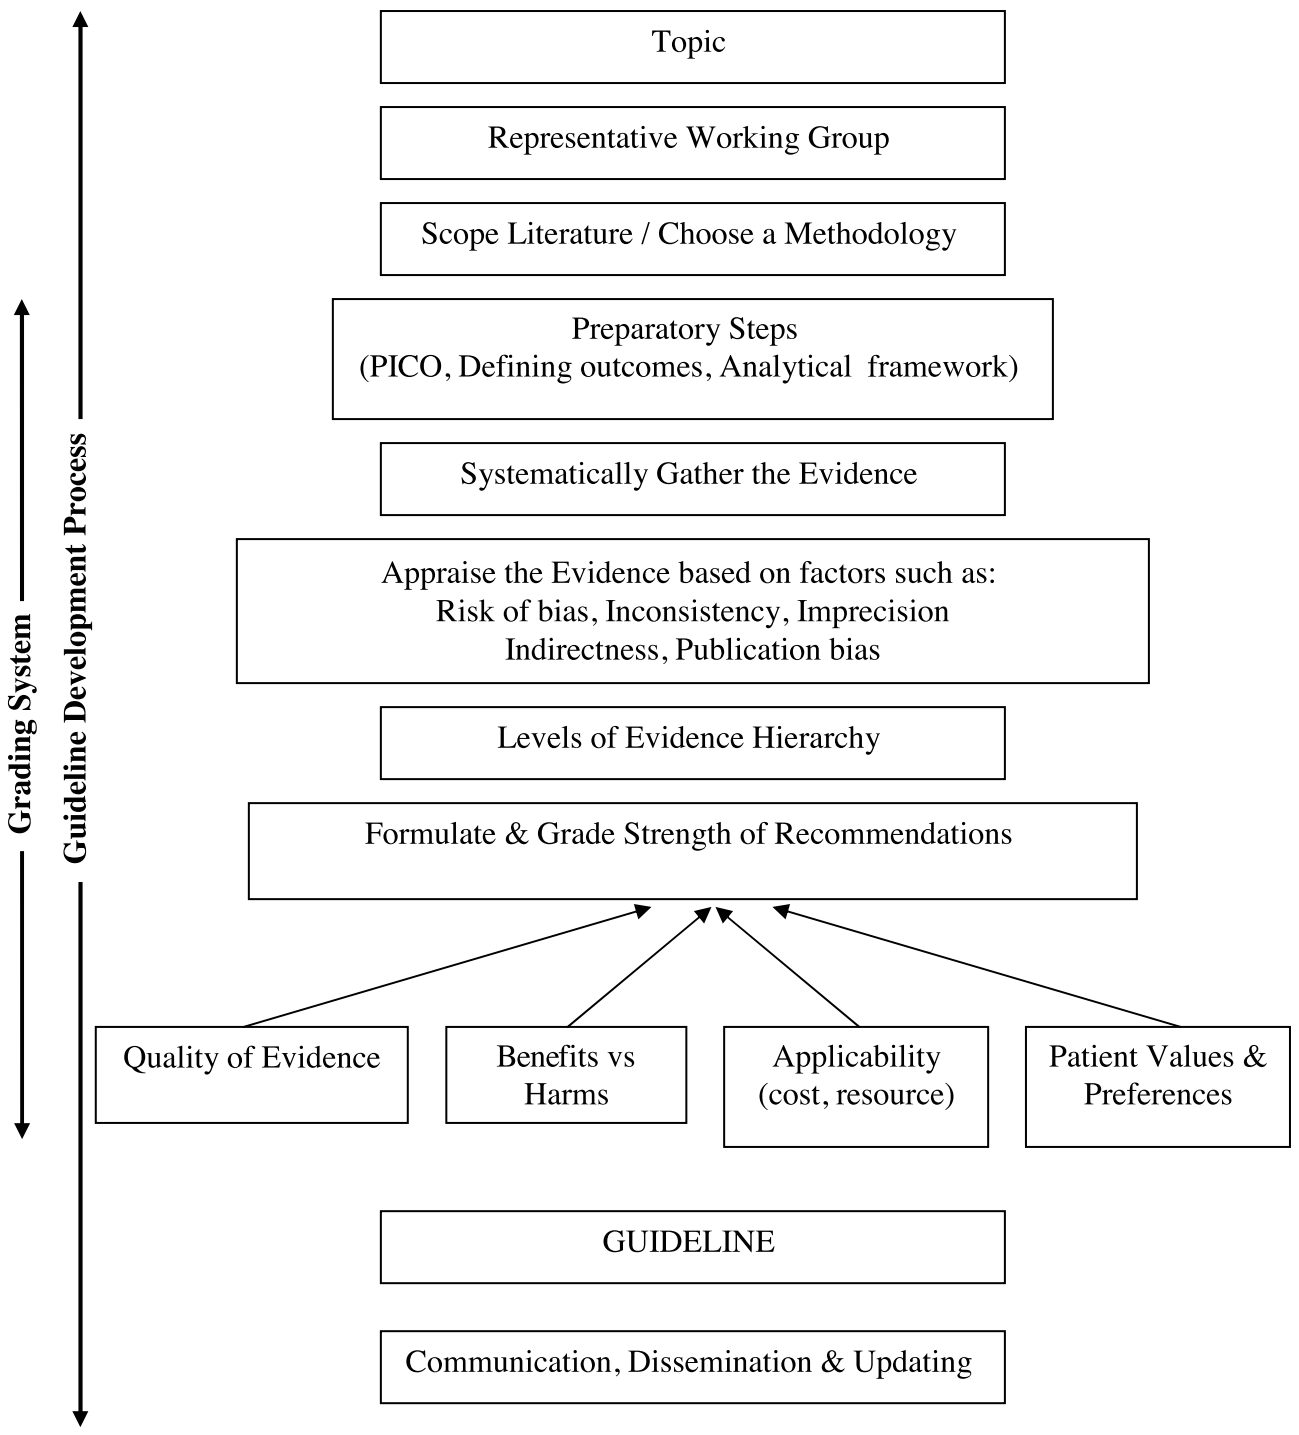

Supplement: MOESM4 [file 9630458]
